# Supplementary material for: Anti-Ma2 Antibody-Associated Paraneoplastic Neurological Syndromes: A Pilot Study
Source: MDPI journal article supplement (doi:10.3390/brainsci11121577), 2021-11-29
Supplement: s1 [file s1]

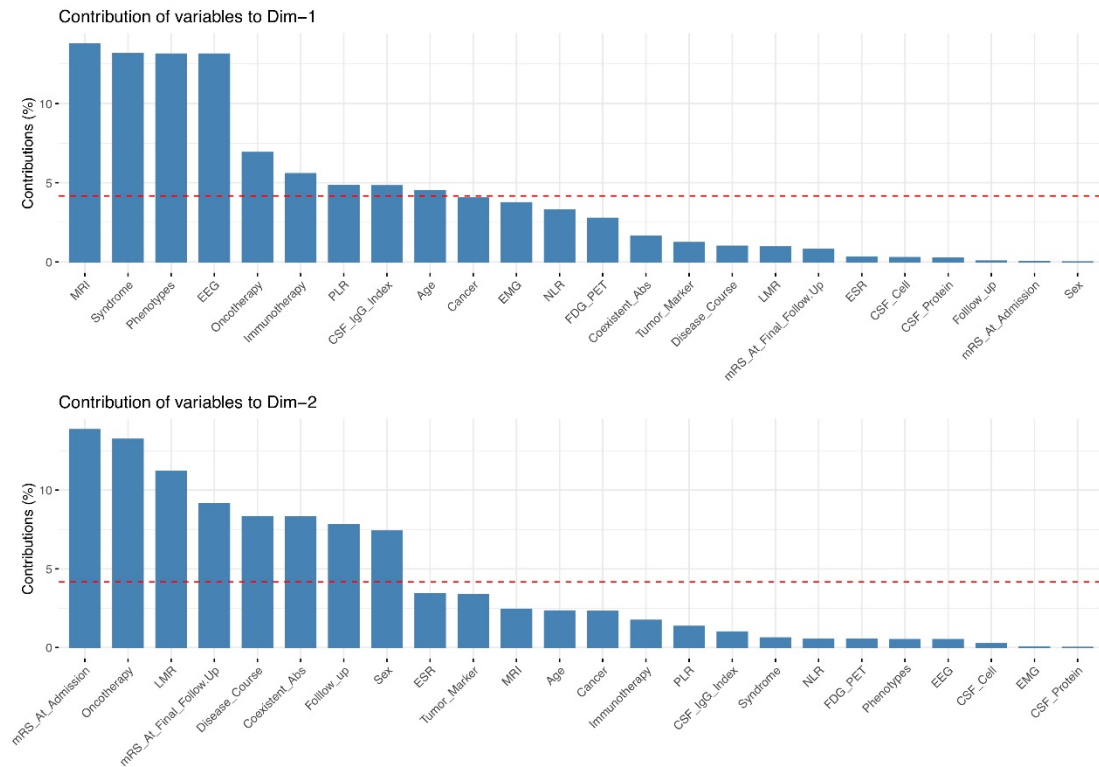

**Figure S1. Contributions of variables in Dims 1 and 2.**

The red dashed line on the graph above indicates the expected average contribution. If the contribution of variables were uniform, the expected value would be  $1/\text{length}(\text{variables}) = 1/10 = 10\%$ . For a given Dim, a variable with a contribution larger than this cutoff could be considered important in contributing to Dim.

Abbreviations: ab, antibody; CSF, cerebrospinal fluid; Dim, dimension; EEG, electroencephalograms; EMG, electromyography; ESR, erythrocyte sedimentation rate; FAMD, factor analysis of mixed data; FDG-PET,  $^{18}\text{F}$ -fluorodeoxyglucose positron emission tomography; IVMP, intravenous methylprednisolone; IVIG, intravenous immunoglobulin; LE, Limbic encephalitis; LMR, lymphocyte to monocyte ratio; MND, motor neuron diseases; MRI, magnetic resonance imaging; mRS, modified Rankin Scale; NLR, neutrophil-to-lymphocyte ratio; PLR,

platelet-to-lymphocyte ratio; SMN, sensorimotor neuropathies.

**Table S1. Eigenvalue and variability explained by the FAMD.**

|       | Eigenvalue<br>variance | Percentage of<br>variance | Cumulative variance percent |
|-------|------------------------|---------------------------|-----------------------------|
| Dim.1 | 7.140                  | 24.620                    | 24.620                      |
| Dim.2 | 5.937                  | 20.471                    | 45.090                      |
| Dim.3 | 4.949                  | 17.067                    | 62.158                      |
| Dim.4 | 4.076                  | 14.055                    | 76.213                      |
| Dim.5 | 3.177                  | 10.955                    | 87.168                      |

Abbreviation: Dim, dimension.

**Table S2. Coordinates, cos2 and contributions of the variables with the first 2 dimensions of FAMD.**

|                | Coordinates |        | Cos2 / quality of<br>representation |        | Contributions |        |
|----------------|-------------|--------|-------------------------------------|--------|---------------|--------|
|                | Dim.1       | Dim.2  | Dim.1                               | Dim.2  | Dim.1         | Dim.2  |
| Age            | 0.3217      | 0.1379 | 0.1035                              | 0.0190 | 4.5063        | 2.3228 |
| Disease course | 0.0705      | 0.4934 | 0.0050                              | 0.2435 | 0.9869        | 8.3114 |

|                        |        |        |        |        |         |         |
|------------------------|--------|--------|--------|--------|---------|---------|
| Follow-up duration     | 0.0039 | 0.4627 | 0.0000 | 0.2141 | 0.0547  | 7.7942  |
| NLR                    | 0.2343 | 0.0312 | 0.0549 | 0.0010 | 3.2812  | 0.5248  |
| PLR                    | 0.3436 | 0.0798 | 0.1180 | 0.0064 | 4.8120  | 1.3439  |
| LMR                    | 0.0677 | 0.6645 | 0.0046 | 0.4415 | 0.9478  | 11.1930 |
| ESR                    | 0.0222 | 0.2024 | 0.0005 | 0.0410 | 0.3113  | 3.4088  |
| CSF Cell               | 0.0193 | 0.0145 | 0.0004 | 0.0002 | 0.2696  | 0.2438  |
| CSF Protein            | 0.0166 | 0.0003 | 0.0003 | 0.0000 | 0.2324  | 0.0045  |
| CSF IgG Index          | 0.3432 | 0.0587 | 0.1178 | 0.0034 | 4.8069  | 0.9887  |
| mRS at admission       | 0.0011 | 0.8215 | 0.0000 | 0.6749 | 0.0149  | 13.8388 |
| mRS at final follow-up | 0.0565 | 0.5416 | 0.0032 | 0.2934 | 0.7918  | 9.1240  |
| Sex                    | 0.0001 | 0.4394 | 0.0000 | 0.1930 | 0.0018  | 7.4009  |
| Syndrome               | 0.9385 | 0.0362 | 0.4404 | 0.0007 | 13.1452 | 0.6094  |
| Clinical phenotypes    | 0.9366 | 0.0296 | 0.8773 | 0.0009 | 13.1188 | 0.4993  |

|                |        |        |        |        |         |         |
|----------------|--------|--------|--------|--------|---------|---------|
| Cancers        | 0.2883 | 0.1365 | 0.0831 | 0.0186 | 4.0381  | 2.2990  |
| Tumor marker   | 0.0874 | 0.1988 | 0.0076 | 0.0395 | 1.2244  | 3.3490  |
| Coexistent abs | 0.1157 | 0.4924 | 0.0134 | 0.2424 | 1.6207  | 8.2938  |
| MRI            | 0.9819 | 0.1440 | 0.4821 | 0.0104 | 13.7533 | 2.4252  |
| EMG            | 0.2666 | 0.0027 | 0.0711 | 0.0000 | 3.7342  | 0.0461  |
| EEG            | 0.9366 | 0.0296 | 0.8773 | 0.0009 | 13.1188 | 0.4993  |
| FDG-PET        | 0.1966 | 0.0310 | 0.0387 | 0.0010 | 2.7537  | 0.5228  |
| Immunotherapy  | 0.3976 | 0.1026 | 0.0527 | 0.0035 | 5.5684  | 1.7278  |
| Oncotherapy    | 0.4931 | 0.7853 | 0.1216 | 0.3084 | 6.9067  | 13.2288 |

Abbreviations: abs, antibodies; cos2, squared cosine; CSF, cerebrospinal fluid; Dim, dimension; EEG, electroencephalograms; EMG, electromyography; ESR, erythrocyte sedimentation rate; FAMD, factor analysis of mixed data; FDG-PET, <sup>18</sup>F-fluorodeoxyglucose positron emission tomography; LMR, lymphocyte to monocyte ratio; MRI, magnetic resonance imaging; mRs, modified Rankin Scale; NLR, neutrophil-to-lymphocyte ratio; PLR, platelet-to-lymphocyte ratio.
